# Supplementary material for: Clinical Acceptability Of Trimetazidine Modified-Release 80 mg Once Daily Versus Trimetazidine Modified-Release 35 mg Twice Daily In Stable Angina Pectoris
Source: Springer Nature journal article supplement (doi:10.1007/s40119-018-0110-5), 2018-05-19
Supplement: MOESM1 [file 15776408]

## Study Investigators

Arkhangelsk: Uskov V.L. Barnaul: Goncharenko I.I., Prasolova T.P. Belgorod: Guseva V.G., Shinkar A.S. Bryansk: Samsonova S.M. Veliky Novgorod: Vikhrova I.V., Kuz'kina S.A. Vladimir: Mitina L.V., Timofeeva I.V. Volgograd: Archakova T.M., Kovaleva N.Y., Romanova E.A., Tivon Y.V. Vologda: Antonova Y.N., Kurganova O.B. Voronezh: Davydova N.N., Klyuchantseva O.V., Popovskaya Y.V., Kharitonova E.I. Evpatoria: Kuzmina T.N. Ekaterinburg: Buzmakova K.V., Kaplenko L.I., Pospelova N.V., Stepanova A.Y. Ivanovo: Kolbasheva N.A. Irkutsk: Krasnova G.M., Pal'vinskaya A.Y., Toloknova V.A. Kazan: Bikmullina R.F., Gainullina A.A., Kedrina E.V., Mikhailova S.A., Nabiullina T.A., Nizamova A.F. Kaluga: Uskova A.A., Yushkova A.E. Kemerovo: Andreeva O.V., Fedotova G.V. Kirov: Bessergeneva O.L., Gavrilyuk D.D., Ehalo N.V., Zlobina M.V. Krasnodar: Zhemartseva E.Y., Markushina I.A., Pavlovets V.P., Sobolenko A.A. Krasnoyarsk: Apanovich I.E., Kireeva N.V., Maksimova I.V. Kursk: Butz T.V., Pavlova I.A. Lipetsk: Bachurina S.N., Orlyachenko S.V. LR Sertolovo: Zaitseva T.V., LR Lomonosov: Beznogova V.F. LR-South: Litsis N.N., Novozhenina A.Y. Moscow: Abramyan L.L., Adamyan M.M., Askerko S.N., Bolmosov A.N., Vasilieva I.N., Volodova S.I., Grishko P.V., Zherebetskaya E.S., Zemlyanaya N.S., Klyshnikova L.N., Kononchik E.I., Kuznetsova N.A., Kuz'minova I.A., Marmurova I.V., Mikhailova R.Y., Mordovina I.P., Nazarkina O.V., Perepechko A.P., Pivovarova N.G., Potapova T.P., Prokofiev D.A., Proniushkina N.E., Savelieva E.V., Semovskikh N.A., Timonenkova L.D., Fomin V.V., Furman O.A., Tsutsieva R.M., Chibrikina M.V., Shoshina I.N., Yashchenko P. Moscow region: Bocharova T.I., Demyanenko O.L., Zhukova L.B., Melnikov A.Y., Merkulieva I.A., Tyasina E.I., Pakholkova N.S., Rogozina S.V., Chugunova I.V. Murmansk: Brazhnik M.L., Guseva Y.V. Naberezhnye Chelny: Anisimova A.N., Kuzeyina S.S., Kulakhmetova R.G., Petrova I.S. Nizhny Novgorod: Ignatyeva I.A., Morozova T.A., Rybnikova N.V., Gritsenko I.I. Novokuznetsk: Kondratskaya O.V., Shishkin A.V. Novosibirsk: Gogleva N.N., Kulipanova V.M., Mitrofanova S.V., Parada E.V., Svistunova S.Y., Sergeeva T.M. Omsk: Kryukova V.V., Suprun T.N., Fedorova E.M., Shnor O.F. Orel: Mitroshina T.N., Shemetova T.S. Orenburg: Val'kevich L.P., Varnikova S.N. Penza: Ivanova E.A. Perm: Shlykova O.N. Pyatigorsk: Guryanova I.R., Zheltova V.L. Rostov-on-Don: Bulygina E.D., Gorskaya E.V., Kosenko L.V., Musaeva F.K., Fedorchenko M.Y., Harish V.I. Ryazan Region: Serbarinova O.M. Ryazan: Yatsenya Y.A. Samara: Golubev M.N., Kopaev D.E., Miludina L.A., Polischuk L.V., Shilintseva O.A., Krylova, L.M. St. Petersburg: Vasilik M.V., Zotov D.D., Kalishevich N.B., Kachmazova L.I., Kontorikova S.G., Mamoshko T.A., Osnovin S.A., Timoshenko (Schmalz) I.O., Kashina A.N., Kiryanova O.G. Saratov: Kotova L.E., Kuvshinova L.E., Ulyanova I.M., Shevelo O.F. Simferopol: Kirieva I.B., Korohova L.V., Smolensk: Lisunova T.I., Medvedeva E.V. Stavropol: Matvienko T.E., Shovgaryan S.L. Stary Oskol: Nebolsina T.F. Syktyvkar: Mikusheva M.A., Misharin N.N. Tver Region: Kutaliya T.O. Tolyatti: Chernova V.N., Yanina Y.A. Tomsk: Permyakova O.V., Skurikhina N.N. Tula: Goldinova L.M., Prikhodko T.N. Tyumen: Myshyakova A.G. Ufa: Akhmerova E.Z., Zaitseva K.V., Ozerchuk A.A., Polyakova I.M., Rodionova, Safiullina I.D. Cheboksary: Arsentieva I.N., Volkova O.O. Chelyabinsk: Kondrina I.N., Kharlova T.E. Yalta: Grigorieva T.L. Yaroslavl: Kurtmulaeva K.V., Rogozina O.M.
